# Supplementary material for: Exploring the structure evolution of MoS2 upon Li/Na/K ion insertion and the origin of the unusual stability in potassium ion batteries
Source: Royal Society of Chemistry journal article supplement (doi:10.1039/d0nh00517g), 2020-01-01
Supplement: d0nh00517g4.pdf [file d0nh00517g4.pdf]

## Supporting Information

### Exploring the structure evolution of MoS<sub>2</sub> upon Li/Na/K ion insertion and origin of unusual stability for potassium ion batteries

Xiaoqiong Du<sup>1,‡</sup>, Xuyun Guo<sup>1,‡</sup>, Jiaqiang Huang<sup>1,‡</sup>, Ziheng Lu<sup>3</sup>, Hong Tan<sup>1,2</sup>, Jian-Qiu Huang<sup>1</sup>,  
Ye Zhu<sup>1,\*</sup>, Biao Zhang<sup>1,2,\*</sup>

1. Department of Applied Physics, Research Institute for Smart Energy, The Hong Kong Polytechnic University, Hung Hom, Hong Kong, China

2. The Hong Kong Polytechnic University Shenzhen Research Institute, Shenzhen 518063, China

3. Shenzhen Institutes of Advanced Technology, Chinese Academy of Sciences, Shenzhen 518055, China

‡ These authors contributed equally.

\* Email: ye.ap.zhu@polyu.edu.hk; biao.ap.zhang@polyu.edu.hk.

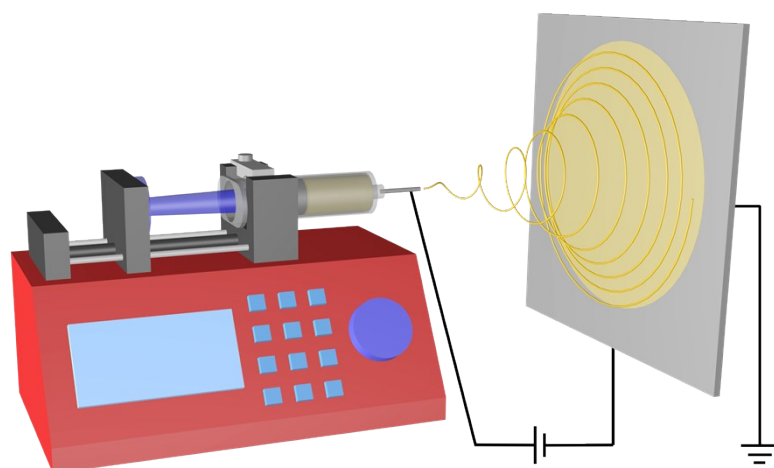

**Figure S1.** Schematic illustration of electrospinning setup.

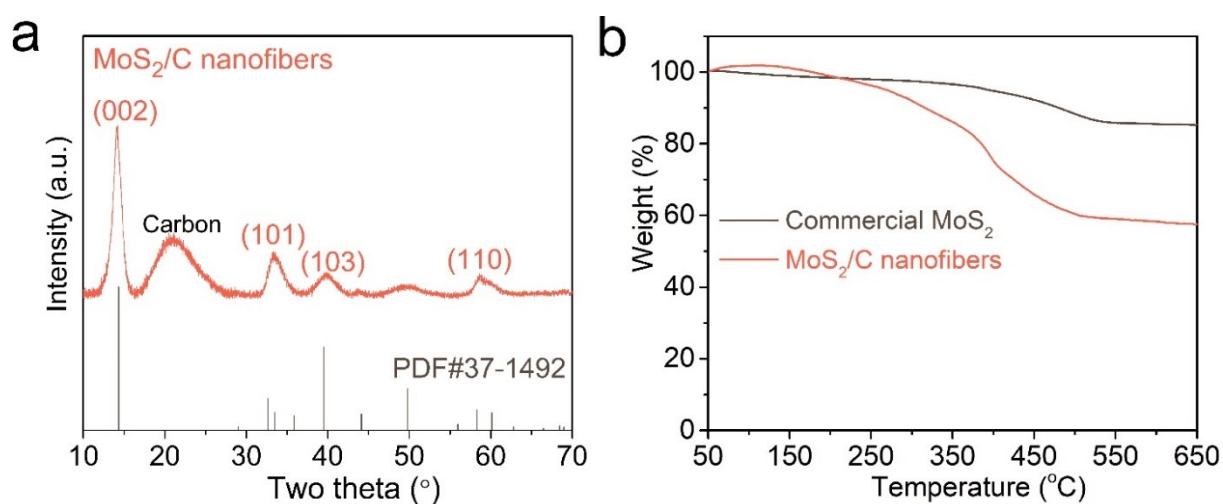

**Figure S2.** MoS<sub>2</sub>/C nanofibers. (a) XRD pattern and (b) TG.

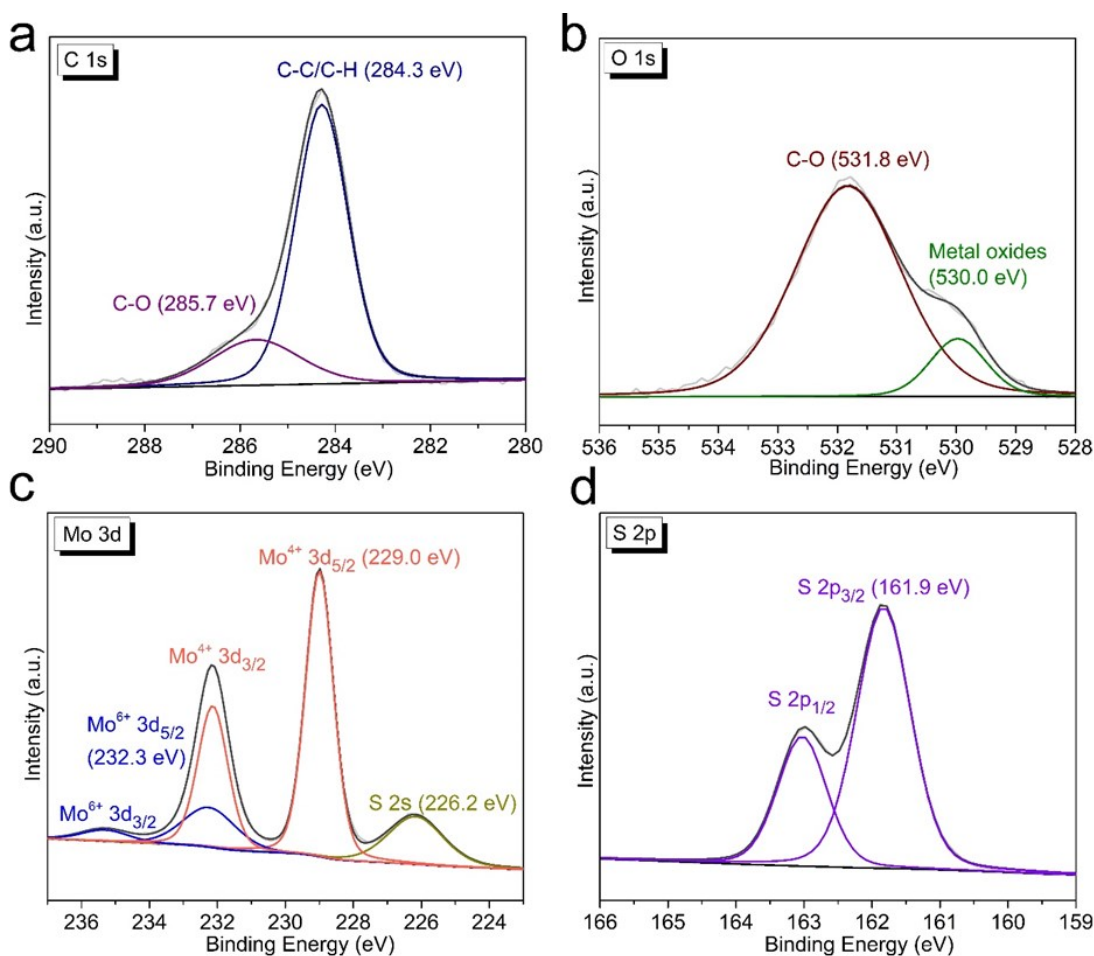

**Figure S3** XPS spectra of MoS<sub>2</sub>/C nanofibers. (a) C1s, (b) O1s, (c) Mo3d and (d) S2p.

Two obvious peaks located at 284.3 eV and 285.7 eV are observed in the C1s spectrum, which corresponded to C-C/C-H and C-O bonding, respectively.<sup>1</sup> The O1s spectrum shows two peaks at 531.8 eV and 530.0 eV, corresponding respectively to the C-O and metal oxides species. The Mo3d spectrum presents two pairs of peaks at 229.0 eV and 232.3 eV with spin-orbital splitting energy of 3.2 eV ( $\Delta=3.2$  eV), corresponding to Mo(IV) and Mo(VI) respectively.<sup>2</sup> Also, one peak at 226.2 eV is related to S2s. The S2p spectrum shows two doublet peaks at 161.9 eV and 163.1 eV ( $\Delta=1.2$  eV), which can be assigned to S 2p<sub>3/2</sub> and S 2p<sub>1/2</sub>, respectively.<sup>3,4</sup> Combining Mo3d and S2p spectra of MoS<sub>2</sub>/C nanofiber, the presence of MoS<sub>2</sub> species is confirmed, and a small amount of Mo(VI) species in Mo 3d spectrum are originated from the oxide layer of the MoS<sub>2</sub>/C nanofiber.

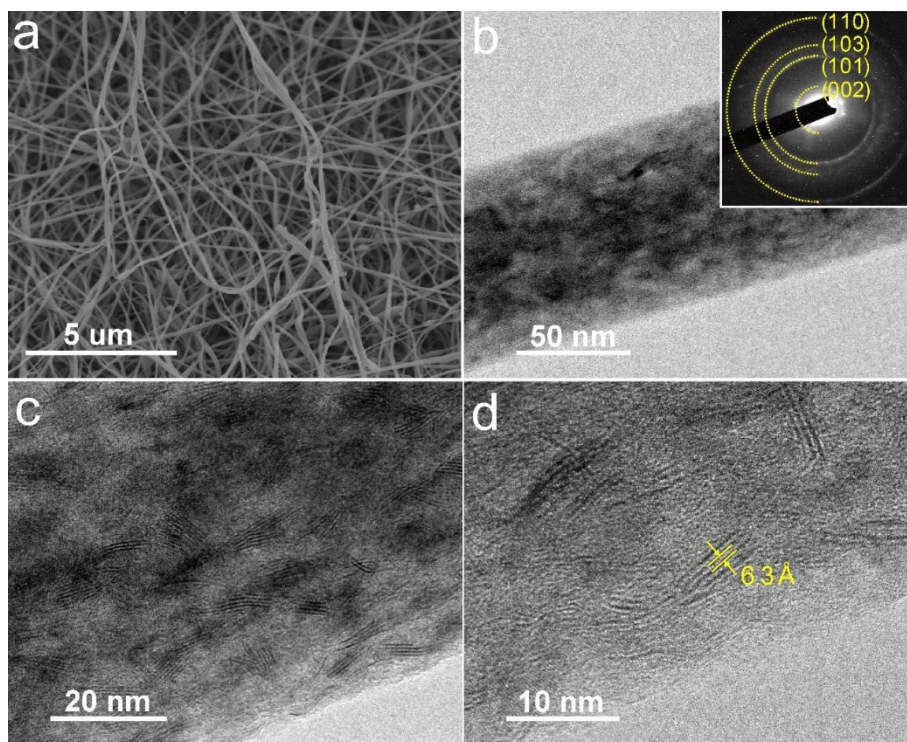

**Figure S4.** MoS<sub>2</sub>/C nanofibers. (a) SEM image; (b, c) TEM images and (b inset) SAED pattern; (d) HRTEM image.

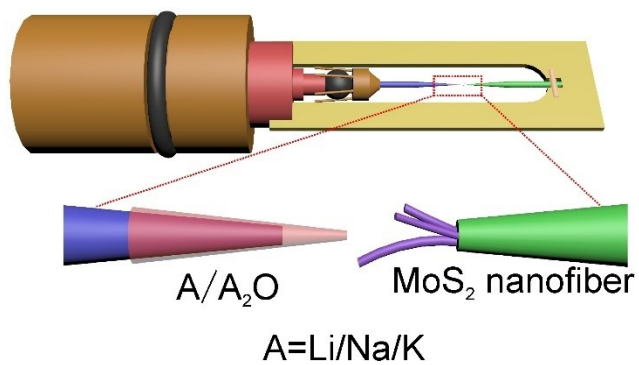

**Figure S5.** Schematic illustration of *in situ* TEM experiment setup.

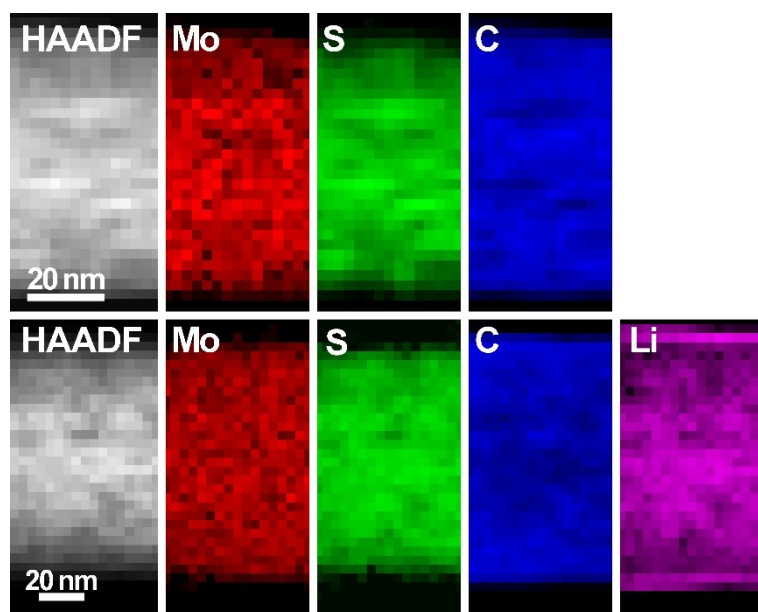

**Figure S6** HAADF-STEM image and corresponding EELS elemental maps of MoS<sub>2</sub>/C nanofibers before (up) and after (below) lithiation.

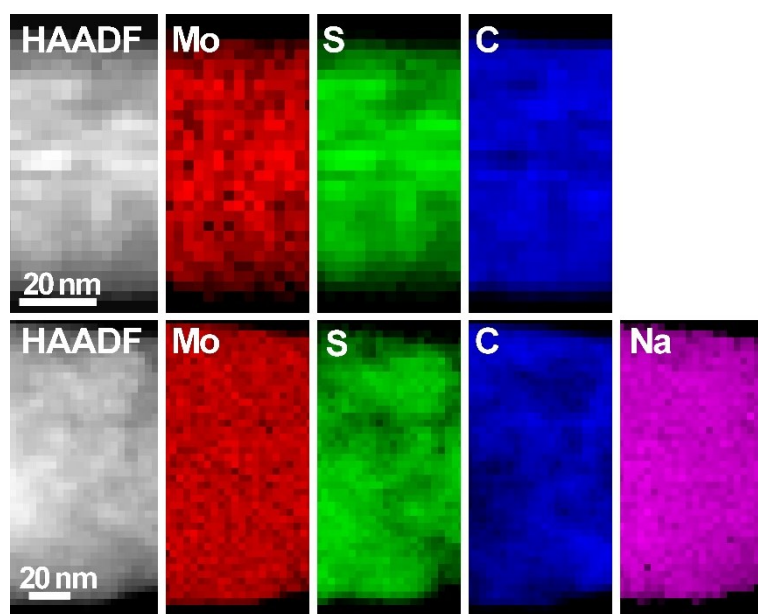

**Figure S7** HAADF-STEM image and corresponding EELS elemental maps of MoS<sub>2</sub>/C nanofibers before (up) and after (below) sodiation.

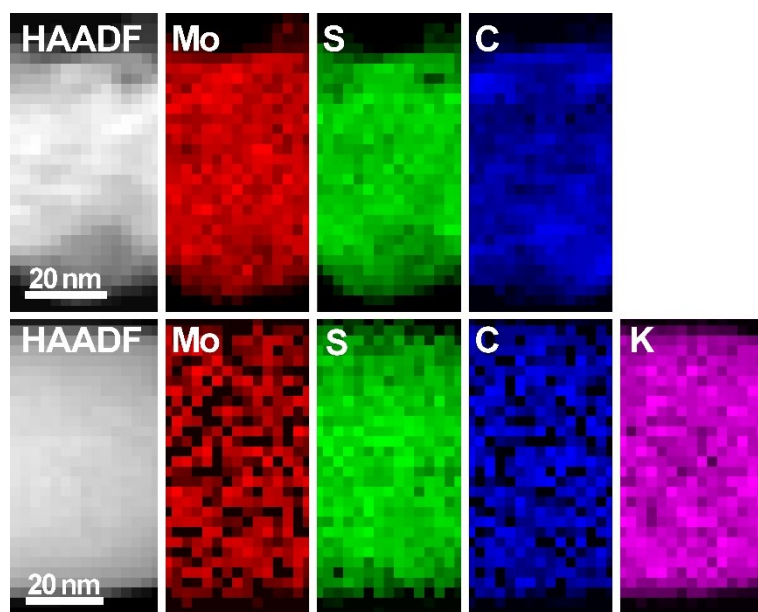

**Figure S8** HAADF-STEM image and corresponding EELS elemental maps of MoS<sub>2</sub>/C nanofibers before (up) and after (below) potassiation.

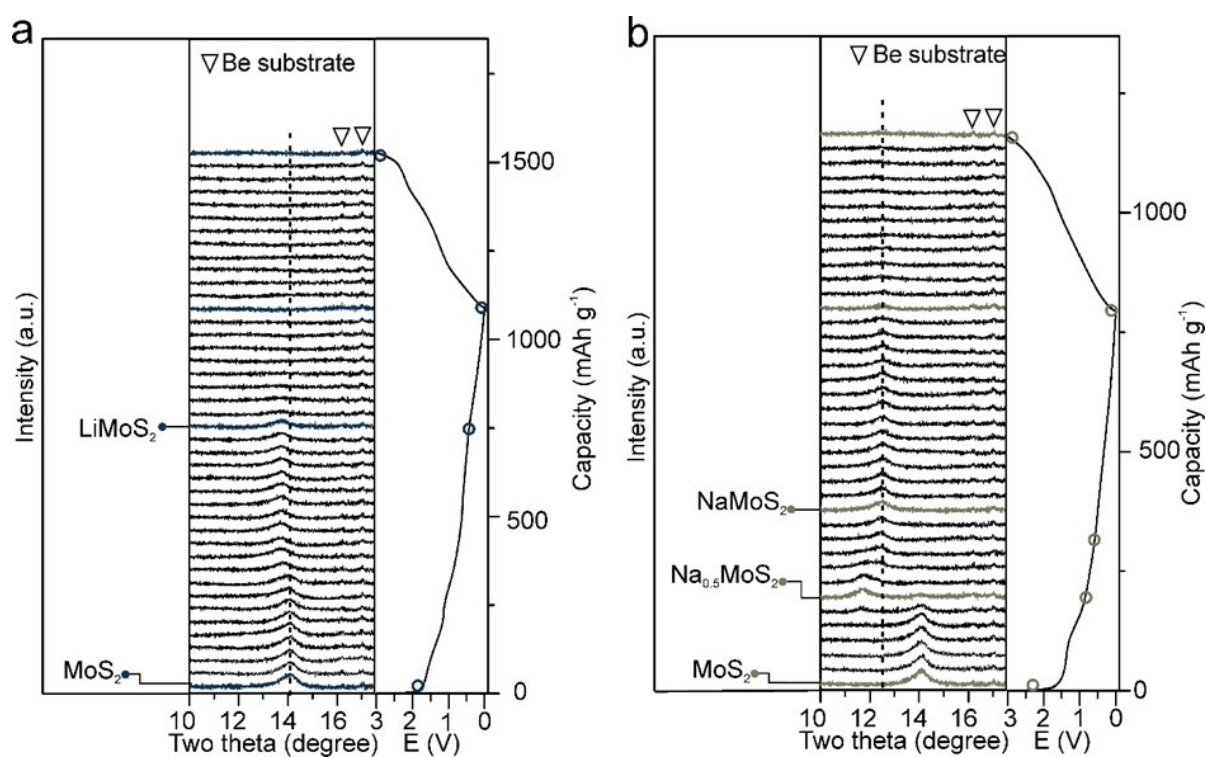

**Figure S9** *In situ* XRD patterns of MoS<sub>2</sub>/C nanofibers in the first cycle for (a) LIBs and (b) SIBs.

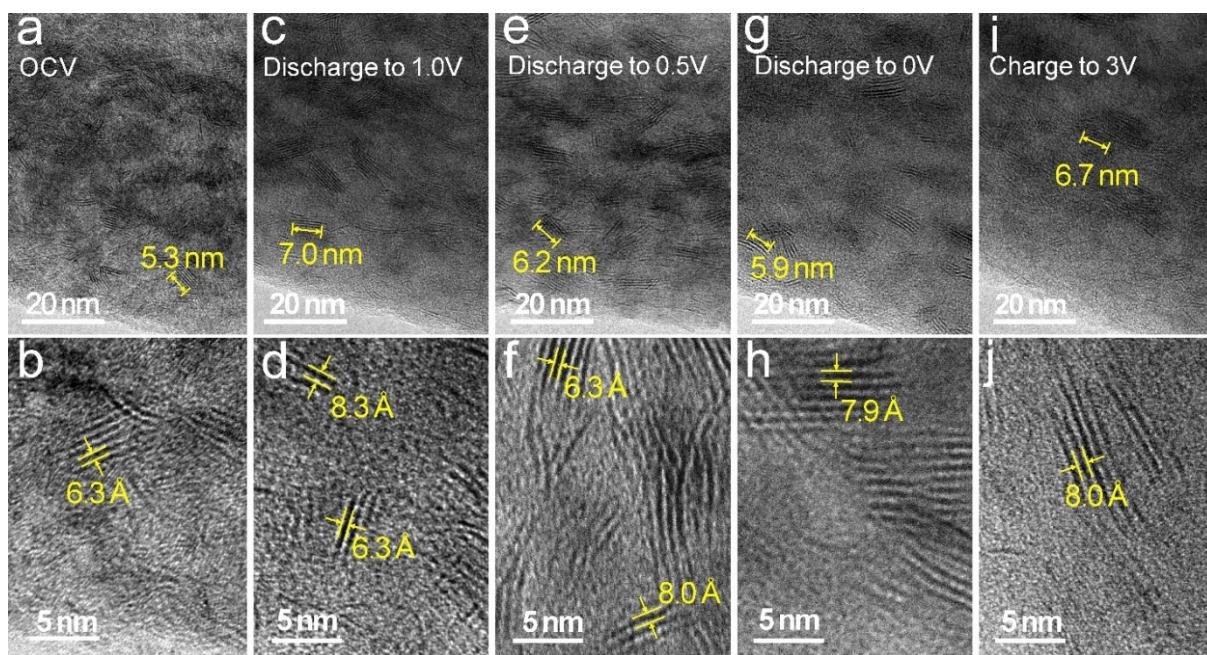

**Figure S10.** *Ex situ* TEM images of MoS<sub>2</sub>/C nanofibers for PIBs on the first cycle. (a, b) OCV state; (c, d) discharge to 1.0 V; (e, f) discharge to 0.5 V; (g, h) discharge to 0 V and (i, j) charge to 3 V.

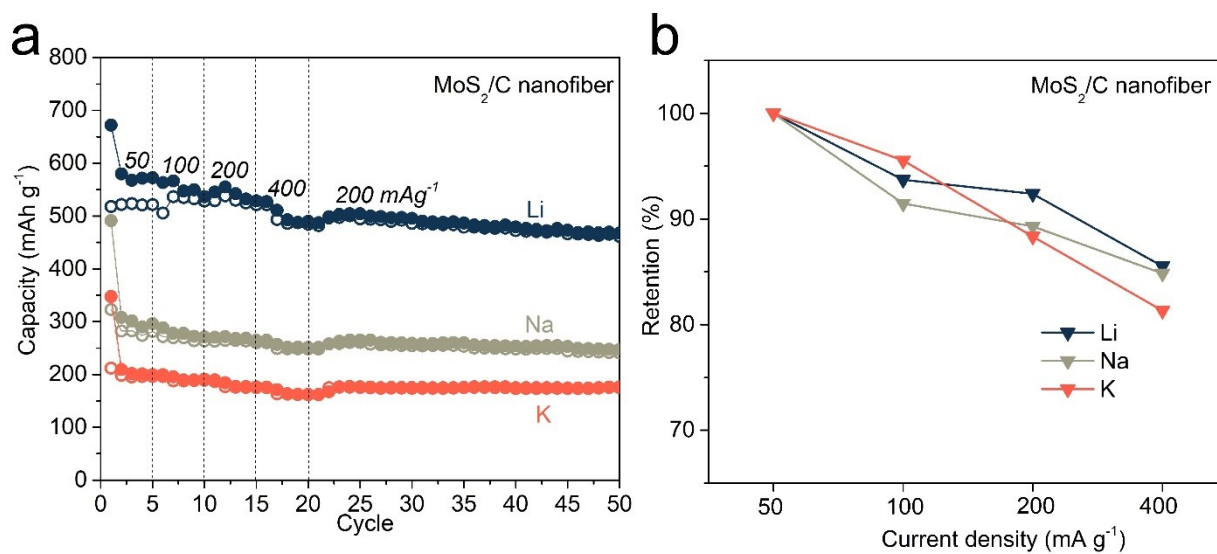

**Figure S11** (a) Rate performance and (b) retention of MoS<sub>2</sub>/C nanofibers in LIBs, SIBs and PIBs. (Retention is based on the discharged capacity in the fifth cycle).

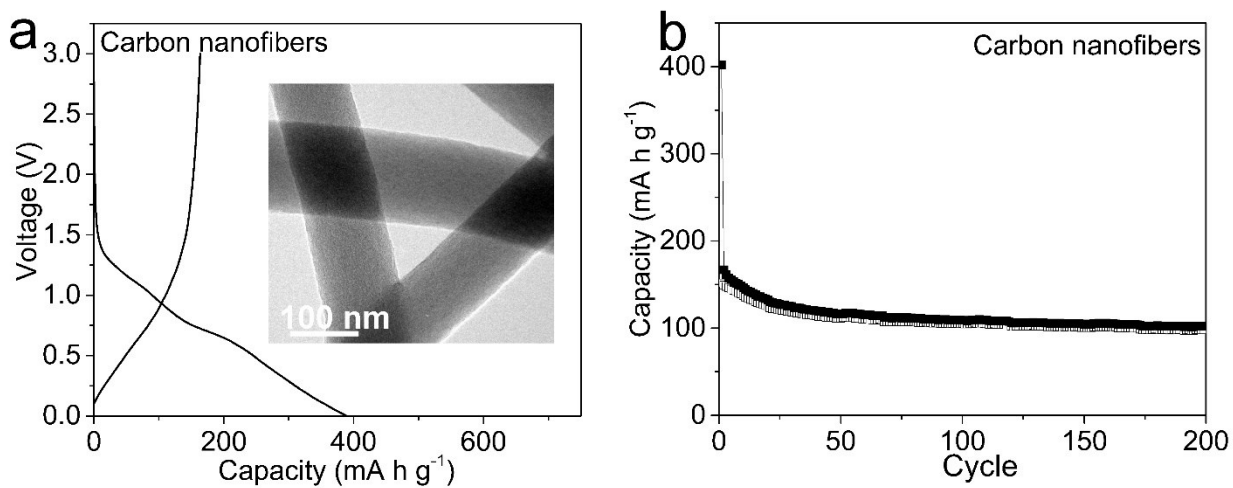

**Figure S12.** Carbon nanofibers. (a) Discharge and charge profiles at first cycle at  $50 \text{ mA g}^{-1}$  (inset: TEM image); (b) cyclic performance at  $500 \text{ mA g}^{-1}$ .

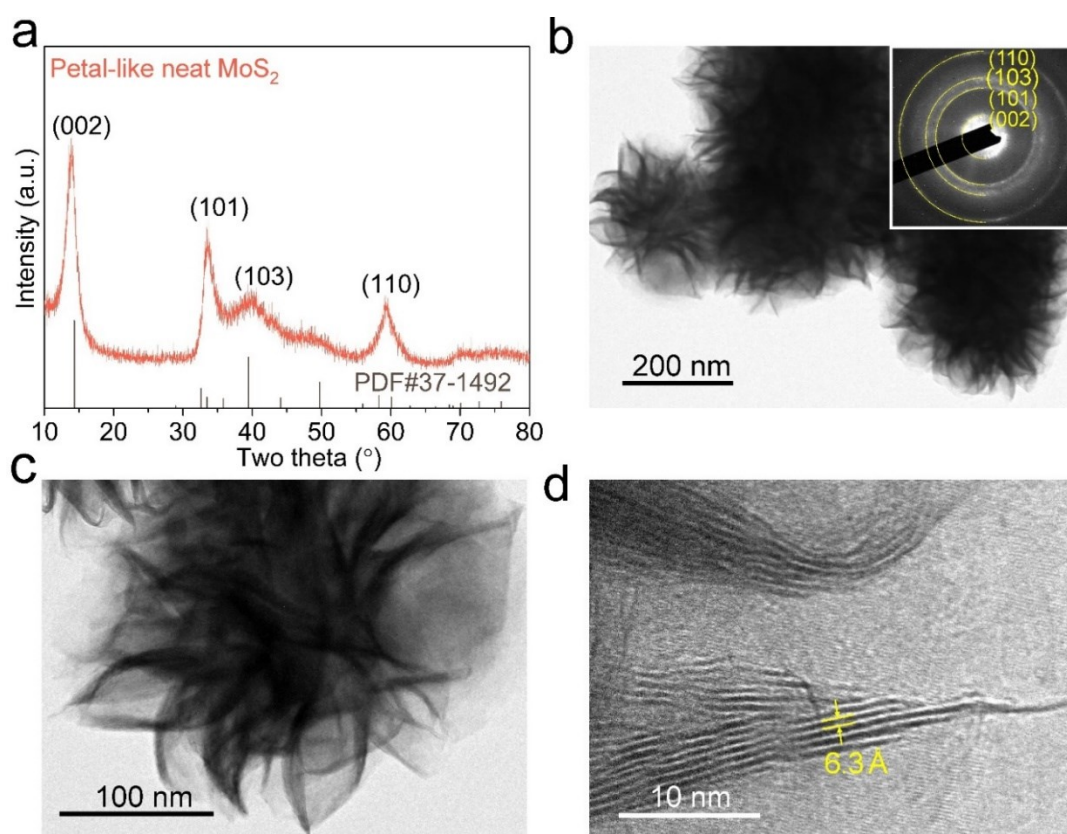

**Figure S13.** Petal-like neat  $\text{MoS}_2$ . (a) XRD pattern; (b, c) TEM images and (b inset) SAED pattern; (d) HRTEM image.



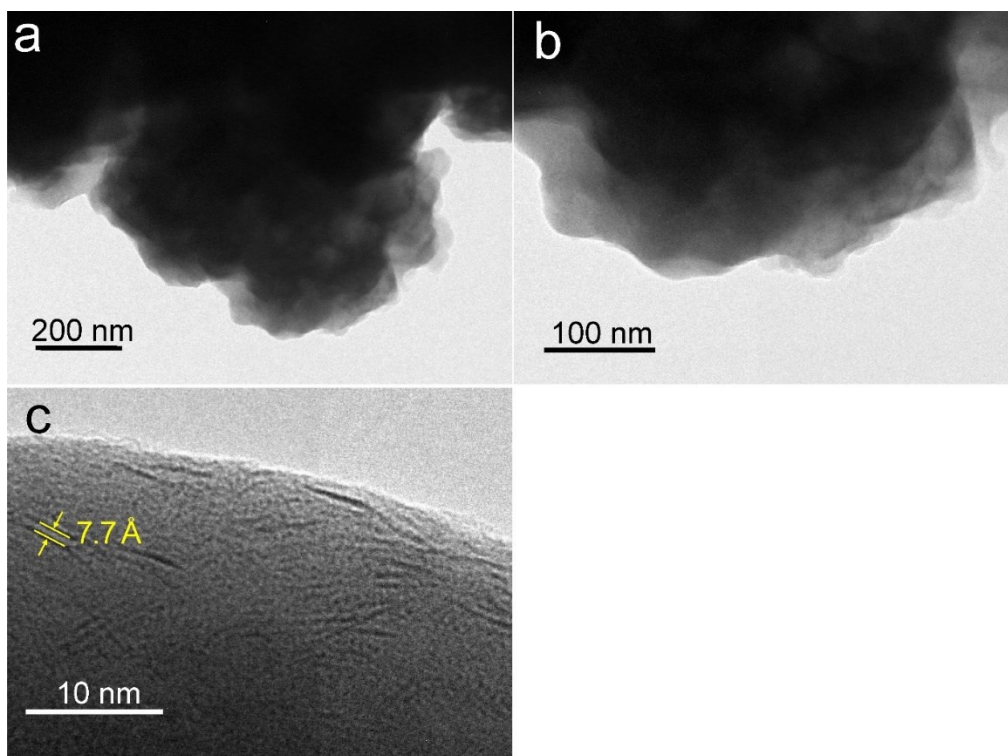

**Figure S14** Petal-like neat MoS<sub>2</sub> cycled 200 times in PIBs. (a, b) TEM and (c) HRTEM images.

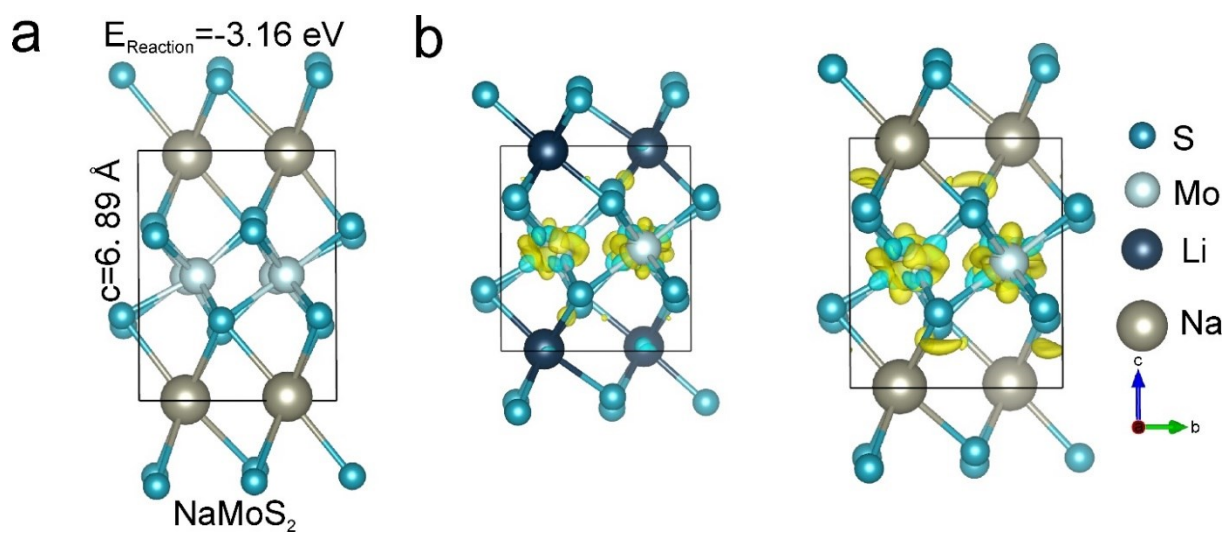

**Figure S15.** DFT simulations. (a) The calculated structures for NaMoS<sub>2</sub>. (b) charge density difference distributions for LiMoS<sub>2</sub> and NaMoS<sub>2</sub>.

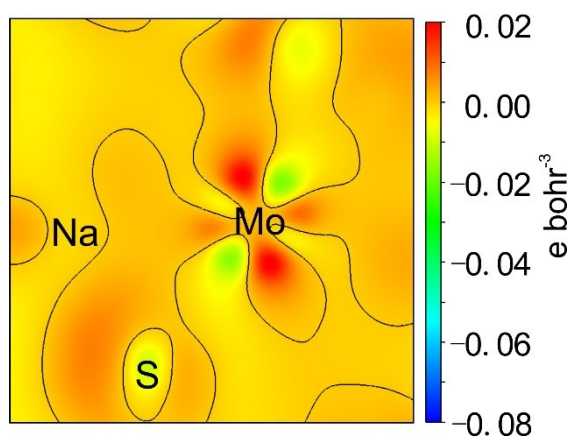

**Figure S16.** Two-dimensional charge density difference of NaMoS<sub>2</sub> across Na and Mo-S.

**Table S1.** Formation energy of conversion reaction calculated by DFT.

| Reaction formula                                   | Formation energy per equation, eV |
|----------------------------------------------------|-----------------------------------|
| LiMoS <sub>2</sub> + 3Li → 2Li <sub>2</sub> S + Mo | -4.46                             |
| NaMoS <sub>2</sub> + 3Na → 2Na <sub>2</sub> S + Mo | -3.16                             |
| KMoS <sub>2</sub> + 3K → 2K <sub>2</sub> S + Mo    | -3.30                             |

**Table S2** Bader charges of LiMoS<sub>2</sub> calculated by DFT.

| LiMoS <sub>2</sub> |          |          |          |          |                 |         |
|--------------------|----------|----------|----------|----------|-----------------|---------|
| #                  | X        | Y        | Z        | CHARGE   | Oxidation State | Element |
| 1                  | -2.59625 | 4.351794 | 0.134735 | 2.131359 | +0.87           | Li      |
| 2                  | 5.868415 | 1.429404 | 6.100381 | 2.131359 | +0.87           | Li      |
| 3                  | 0.517746 | 4.465521 | 6.175856 | 2.132736 | +0.87           | Li      |
| 4                  | 2.754427 | 1.315677 | 0.05926  | 2.132736 | +0.87           | Li      |
| 5                  | 2.391099 | 3.387824 | 4.840575 | 6.962424 | -0.96           | S       |
| 6                  | 0.881067 | 2.393374 | 1.394541 | 6.962349 | -0.96           | S       |
| 7                  | 0.955075 | 0.435462 | 4.67217  | 6.9866   | -0.99           | S       |

|    |          |          |          |          |       |    |
|----|----------|----------|----------|----------|-------|----|
| 8  | 2.317091 | 5.345736 | 1.562946 | 6.986556 | -0.99 | S  |
| 9  | 4.311079 | 0.493176 | 4.373794 | 7.053876 | -1.05 | S  |
| 10 | -1.03891 | 5.288022 | 1.861322 | 7.053828 | -1.05 | S  |
| 11 | -1.03702 | 3.367625 | 4.500062 | 7.007187 | -1.01 | S  |
| 12 | 4.309182 | 2.413573 | 1.735054 | 7.007164 | -1.01 | S  |
| 13 | 3.778862 | 4.345525 | 3.142108 | 12.8646  | +1.14 | Mo |
| 14 | -0.5067  | 1.435673 | 3.093008 | 12.86467 | +1.14 | Mo |
| 15 | 0.865863 | 4.060564 | 3.116212 | 12.86171 | +1.14 | Mo |
| 16 | 2.406303 | 1.720634 | 3.118904 | 12.86085 | +1.14 | Mo |

**Table S3** Bader charges of NaMoS<sub>2</sub> calculated by DFT.

| NaMoS <sub>2</sub> |          |          |          |          |                 |         |
|--------------------|----------|----------|----------|----------|-----------------|---------|
| #                  | X        | Y        | Z        | CHARGE   | Oxidation State | Element |
| 1                  | -2.68713 | 4.411477 | 0.115238 | 6.165944 | +0.83           | Na      |
| 2                  | 6.011861 | 1.441757 | 6.780476 | 6.165944 | +0.83           | Na      |
| 3                  | 0.557591 | 4.486844 | 6.851725 | 6.167469 | +0.83           | Na      |
| 4                  | 2.76714  | 1.36639  | 0.043989 | 6.167469 | +0.83           | Na      |
| 5                  | 2.406841 | 3.428325 | 5.153568 | 6.978188 | -0.98           | S       |
| 6                  | 0.91789  | 2.424909 | 1.742146 | 6.978148 | -0.98           | S       |
| 7                  | 0.981562 | 0.439282 | 4.975082 | 6.985821 | -0.99           | S       |
| 8                  | 2.343169 | 5.413952 | 1.920632 | 6.985813 | -0.99           | S       |
| 9                  | 4.381836 | 0.495296 | 4.688035 | 7.011752 | -1.01           | S       |
| 10                 | -1.05711 | 5.357938 | 2.207672 | 7.011705 | -1.01           | S       |
| 11                 | -1.04972 | 3.408524 | 4.80387  | 6.983182 | -0.98           | S       |

|    |          |          |          |          |       |    |
|----|----------|----------|----------|----------|-------|----|
| 12 | 4.374454 | 2.44471  | 2.091837 | 6.983133 | -0.98 | S  |
| 13 | 3.824744 | 4.393717 | 3.476137 | 12.85711 | +1.14 | Mo |
| 14 | -0.50001 | 1.459517 | 3.419577 | 12.85718 | +1.14 | Mo |
| 15 | 0.875727 | 4.111541 | 3.444425 | 12.85082 | +1.15 | Mo |
| 16 | 2.449004 | 1.741693 | 3.451289 | 12.85032 | +1.15 | Mo |

**Table S4** Bader charges of  $\text{KMoS}_2$  calculated by DFT.

| <b><math>\text{KMoS}_2</math></b> |          |          |          |          |                 |         |
|-----------------------------------|----------|----------|----------|----------|-----------------|---------|
| #                                 | X        | Y        | Z        | CHARGE   | Oxidation State | Element |
| 1                                 | 4.270296 | 4.479503 | 0.136914 | 8.259457 | +0.74           | K       |
| 2                                 | -0.89309 | 1.455631 | 7.408322 | 8.259471 | +0.74           | K       |
| 3                                 | 0.563109 | 4.541108 | 7.502254 | 8.258091 | +0.74           | K       |
| 4                                 | 2.814099 | 1.394026 | 0.042982 | 8.258051 | +0.74           | K       |
| 5                                 | 2.426208 | 3.475775 | 5.457142 | 6.965643 | -0.97           | S       |
| 6                                 | 0.951    | 2.459359 | 2.088094 | 6.965636 | -0.97           | S       |
| 7                                 | 1.001139 | 0.447763 | 5.276035 | 6.957248 | -0.96           | S       |
| 8                                 | 2.376069 | 5.487371 | 2.269201 | 6.957248 | -0.96           | S       |
| 9                                 | 4.462263 | 0.497803 | 4.986754 | 6.954054 | -0.95           | S       |
| 10                                | -1.08506 | 5.437331 | 2.558482 | 6.95402  | -0.95           | S       |
| 11                                | -1.06381 | 3.449415 | 5.101707 | 6.93455  | -0.93           | S       |
| 12                                | 4.441016 | 2.485719 | 2.443521 | 6.934514 | -0.93           | S       |
| 13                                | 3.878334 | 4.454059 | 3.806855 | 12.83436 | +1.17           | Mo      |
| 14                                | -0.50113 | 1.481075 | 3.738381 | 12.83442 | +1.17           | Mo      |
| 15                                | 0.88392  | 4.170707 | 3.766507 | 12.83674 | +1.16           | Mo      |

---

|    |          |          |          |         |       |    |
|----|----------|----------|----------|---------|-------|----|
| 16 | 2.493288 | 1.764427 | 3.778729 | 12.8365 | +1.16 | Mo |
|----|----------|----------|----------|---------|-------|----|

---

## References

1. J. Ge, L. Fan, J. Wang, Q. Zhang, Z. Liu, E. Zhang, Q. Liu, X. Yu and B. Lu, *Adv. Energy Mater.*, 2018, **8**, 1801477.
2. Y. Fang, X. Y. Yu and X. W. Lou, *Angew. Chem. Int. Ed. Engl.*, 2019, **58**, 7744-7748.
3. B. Jia, Q. Yu, Y. Zhao, M. Qin, W. Wang, Z. Liu, C. Y. Lao, Y. Liu, H. Wu and Z. Zhang, *Adv. Funct. Mater.*, 2018, **28**, 1803409.
4. G. K. Veerasubramani, M.-S. Park, G. Nagaraju and D.-W. Kim, *J. Mater. Chem. A*, 2019, **7**, 24557-24568.
